# Supplementary material for: Expression and Functional Characterization of a Novel Antimicrobial Peptide: Human Beta‐Defensin 118
Source: Hindawi journal article supplement (doi:10.1155/2020/1395304), 2020-01-01
Supplement: f1 [file 1395304.f1.pdf]

*EcoR I*

**GAATTC**TATAGTGGTGAAAAAAAAATGCTGGAACAGAT  
CAGGGCACTGCAGGAAACAATGCAAAGATGGAGAA  
GCAGTGAAAGATACATGCAAAAATCTTCGAGCTTGCT  
GCATTCCATCCAATGAAGACCACAGGCGAGTTCCTG  
CGACATCTCCCACACCCTTGAGTGACTCAACACCAG  
GAATTATTGATGATATTTTAACAGTAAGGTTACGACA  
GACTACTTTGAAGTAAGCAGCAAGAAAGATATGGTT  
GAAGAGTCTGAGGCGGGAAGGGGAACTGAGACCTC  
TCTTCCAAATGTTACCATAGCTCATGA**GCGGCCGC**

*Not I*
