# Supplementary material for: Expression and Functional Characterization of a Novel Antimicrobial Peptide: Human Beta‐Defensin 118
Source: Hindawi journal article supplement (doi:10.1155/2020/1395304), 2020-01-01

M1 1 2 M2

bp

10000-  
7000-  
4000-  
2000-  
1000-  
500-  
250-

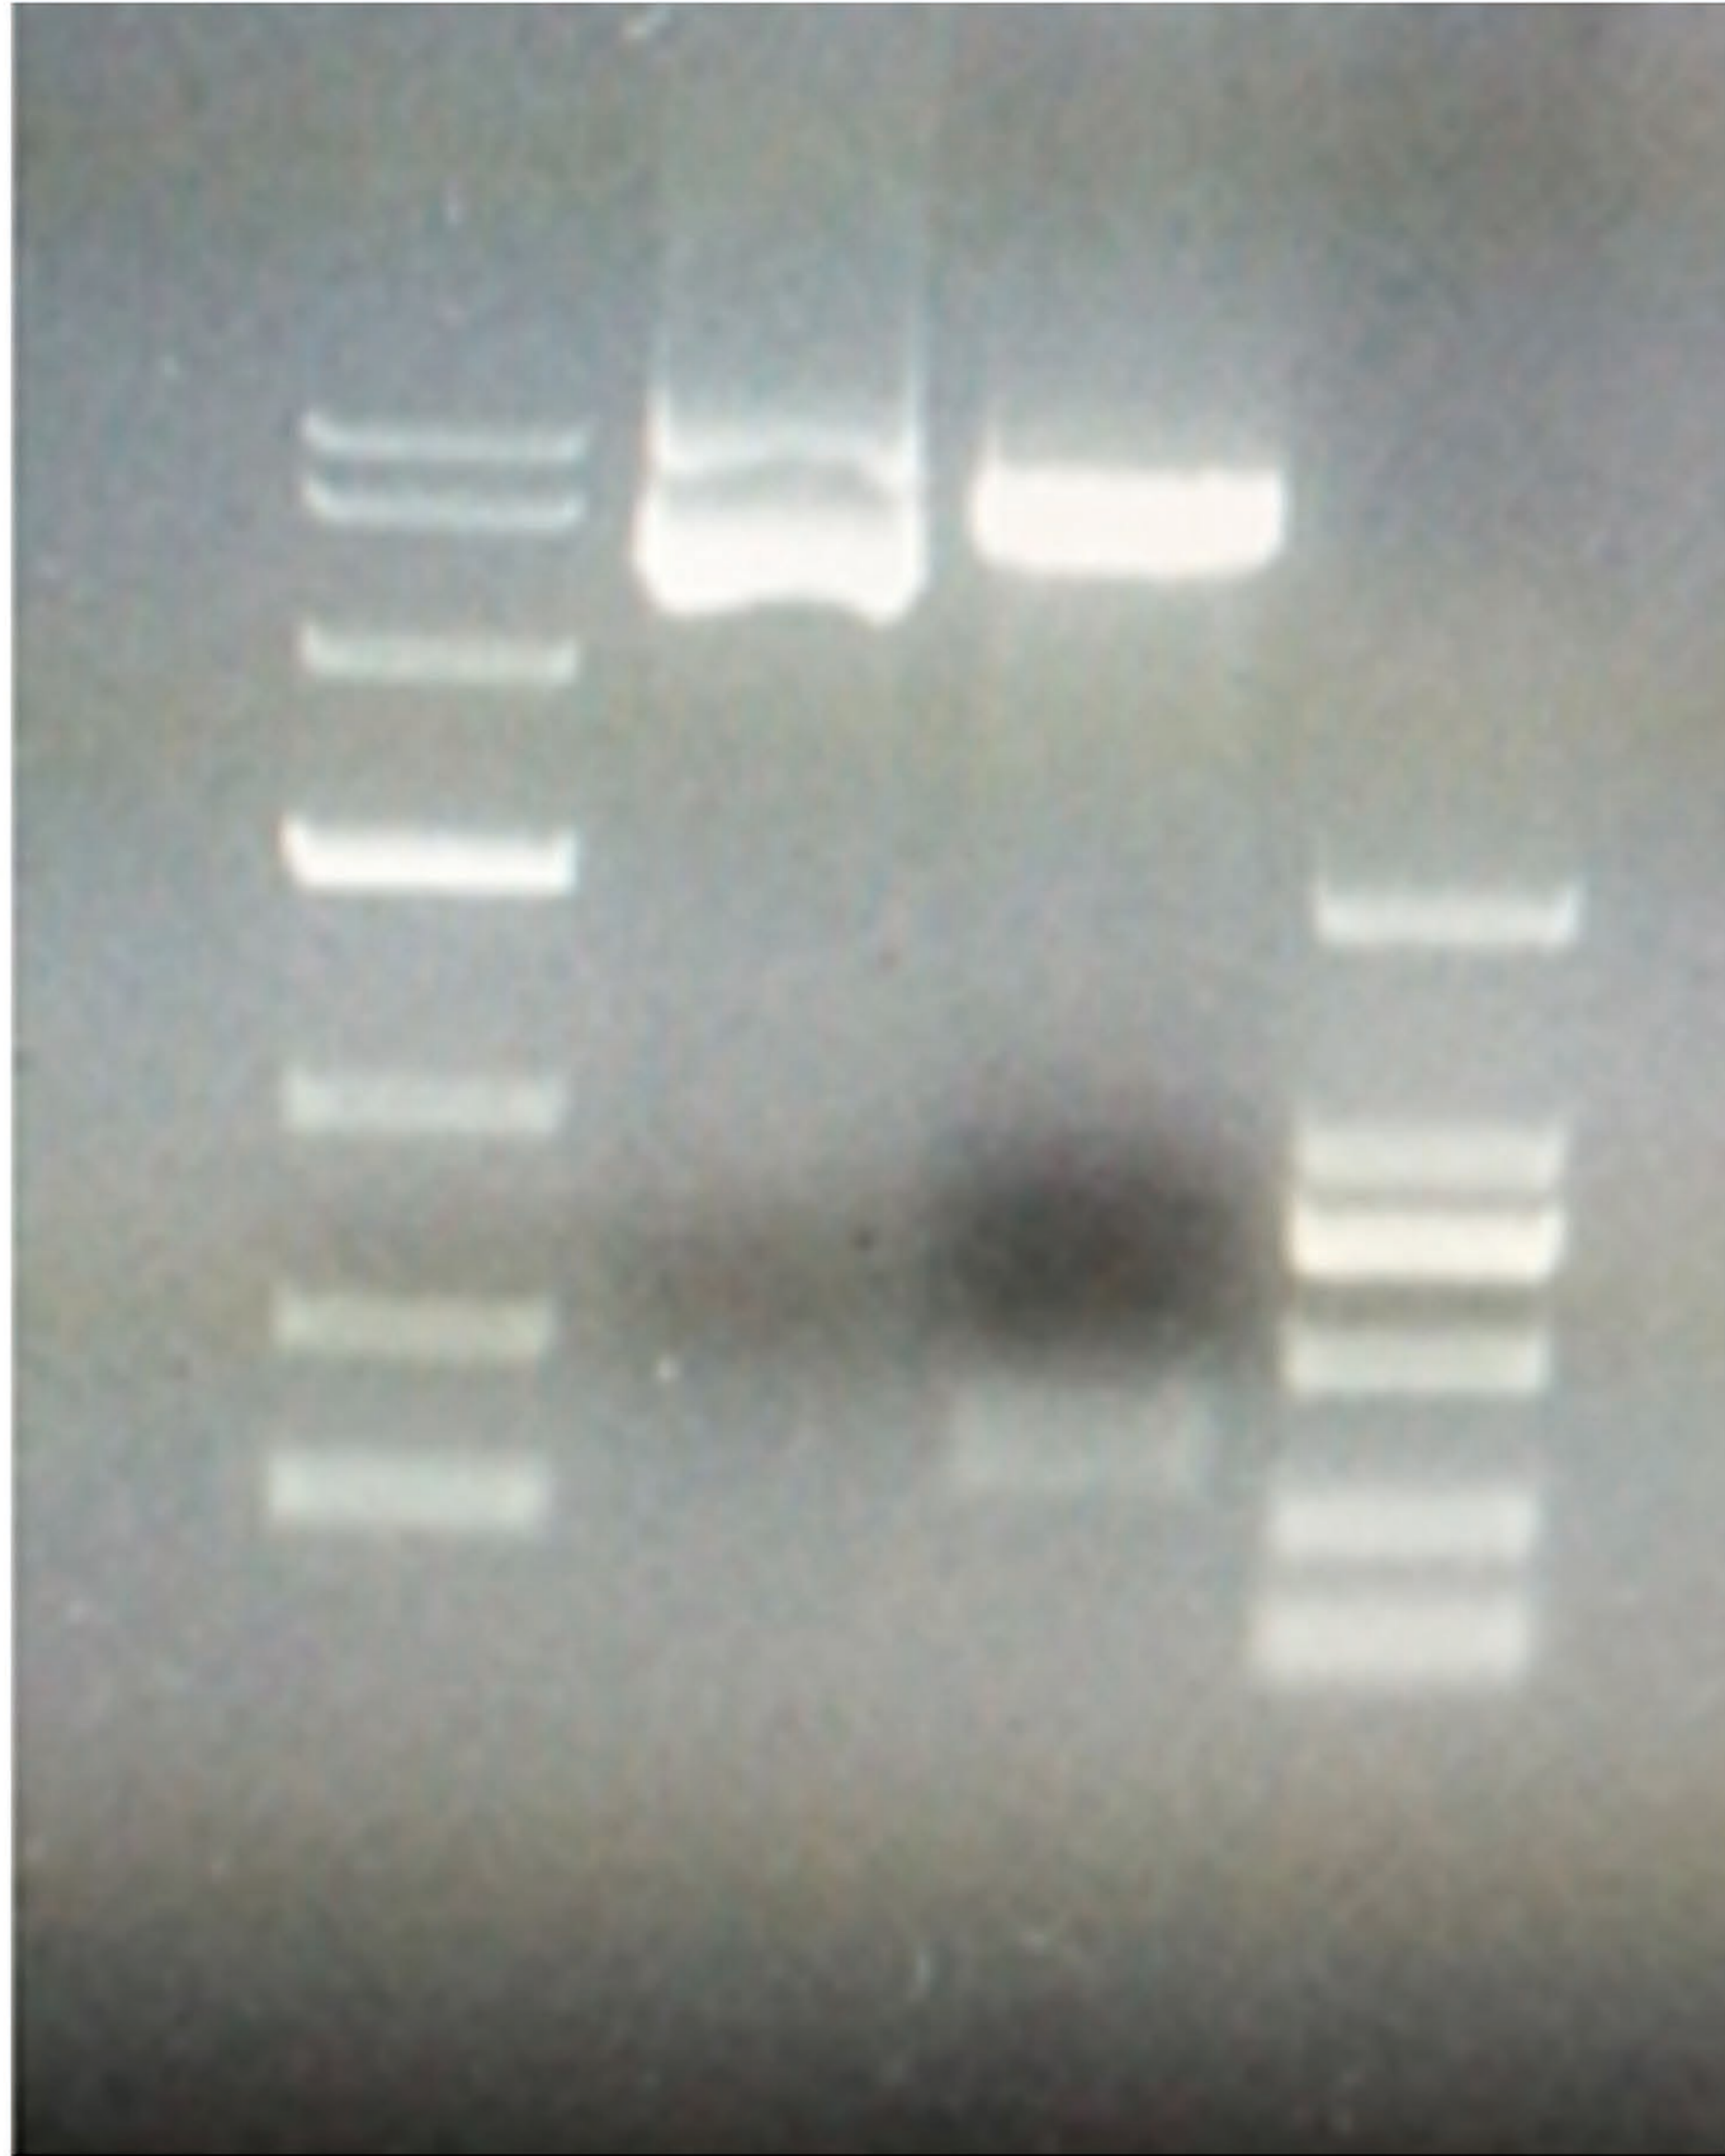

bp

-2000  
-1500  
-750  
-500  
-250  
-100

M 1 2 3 4

bp

2000-  
1000-  
750-  
500-  
250-  
100-

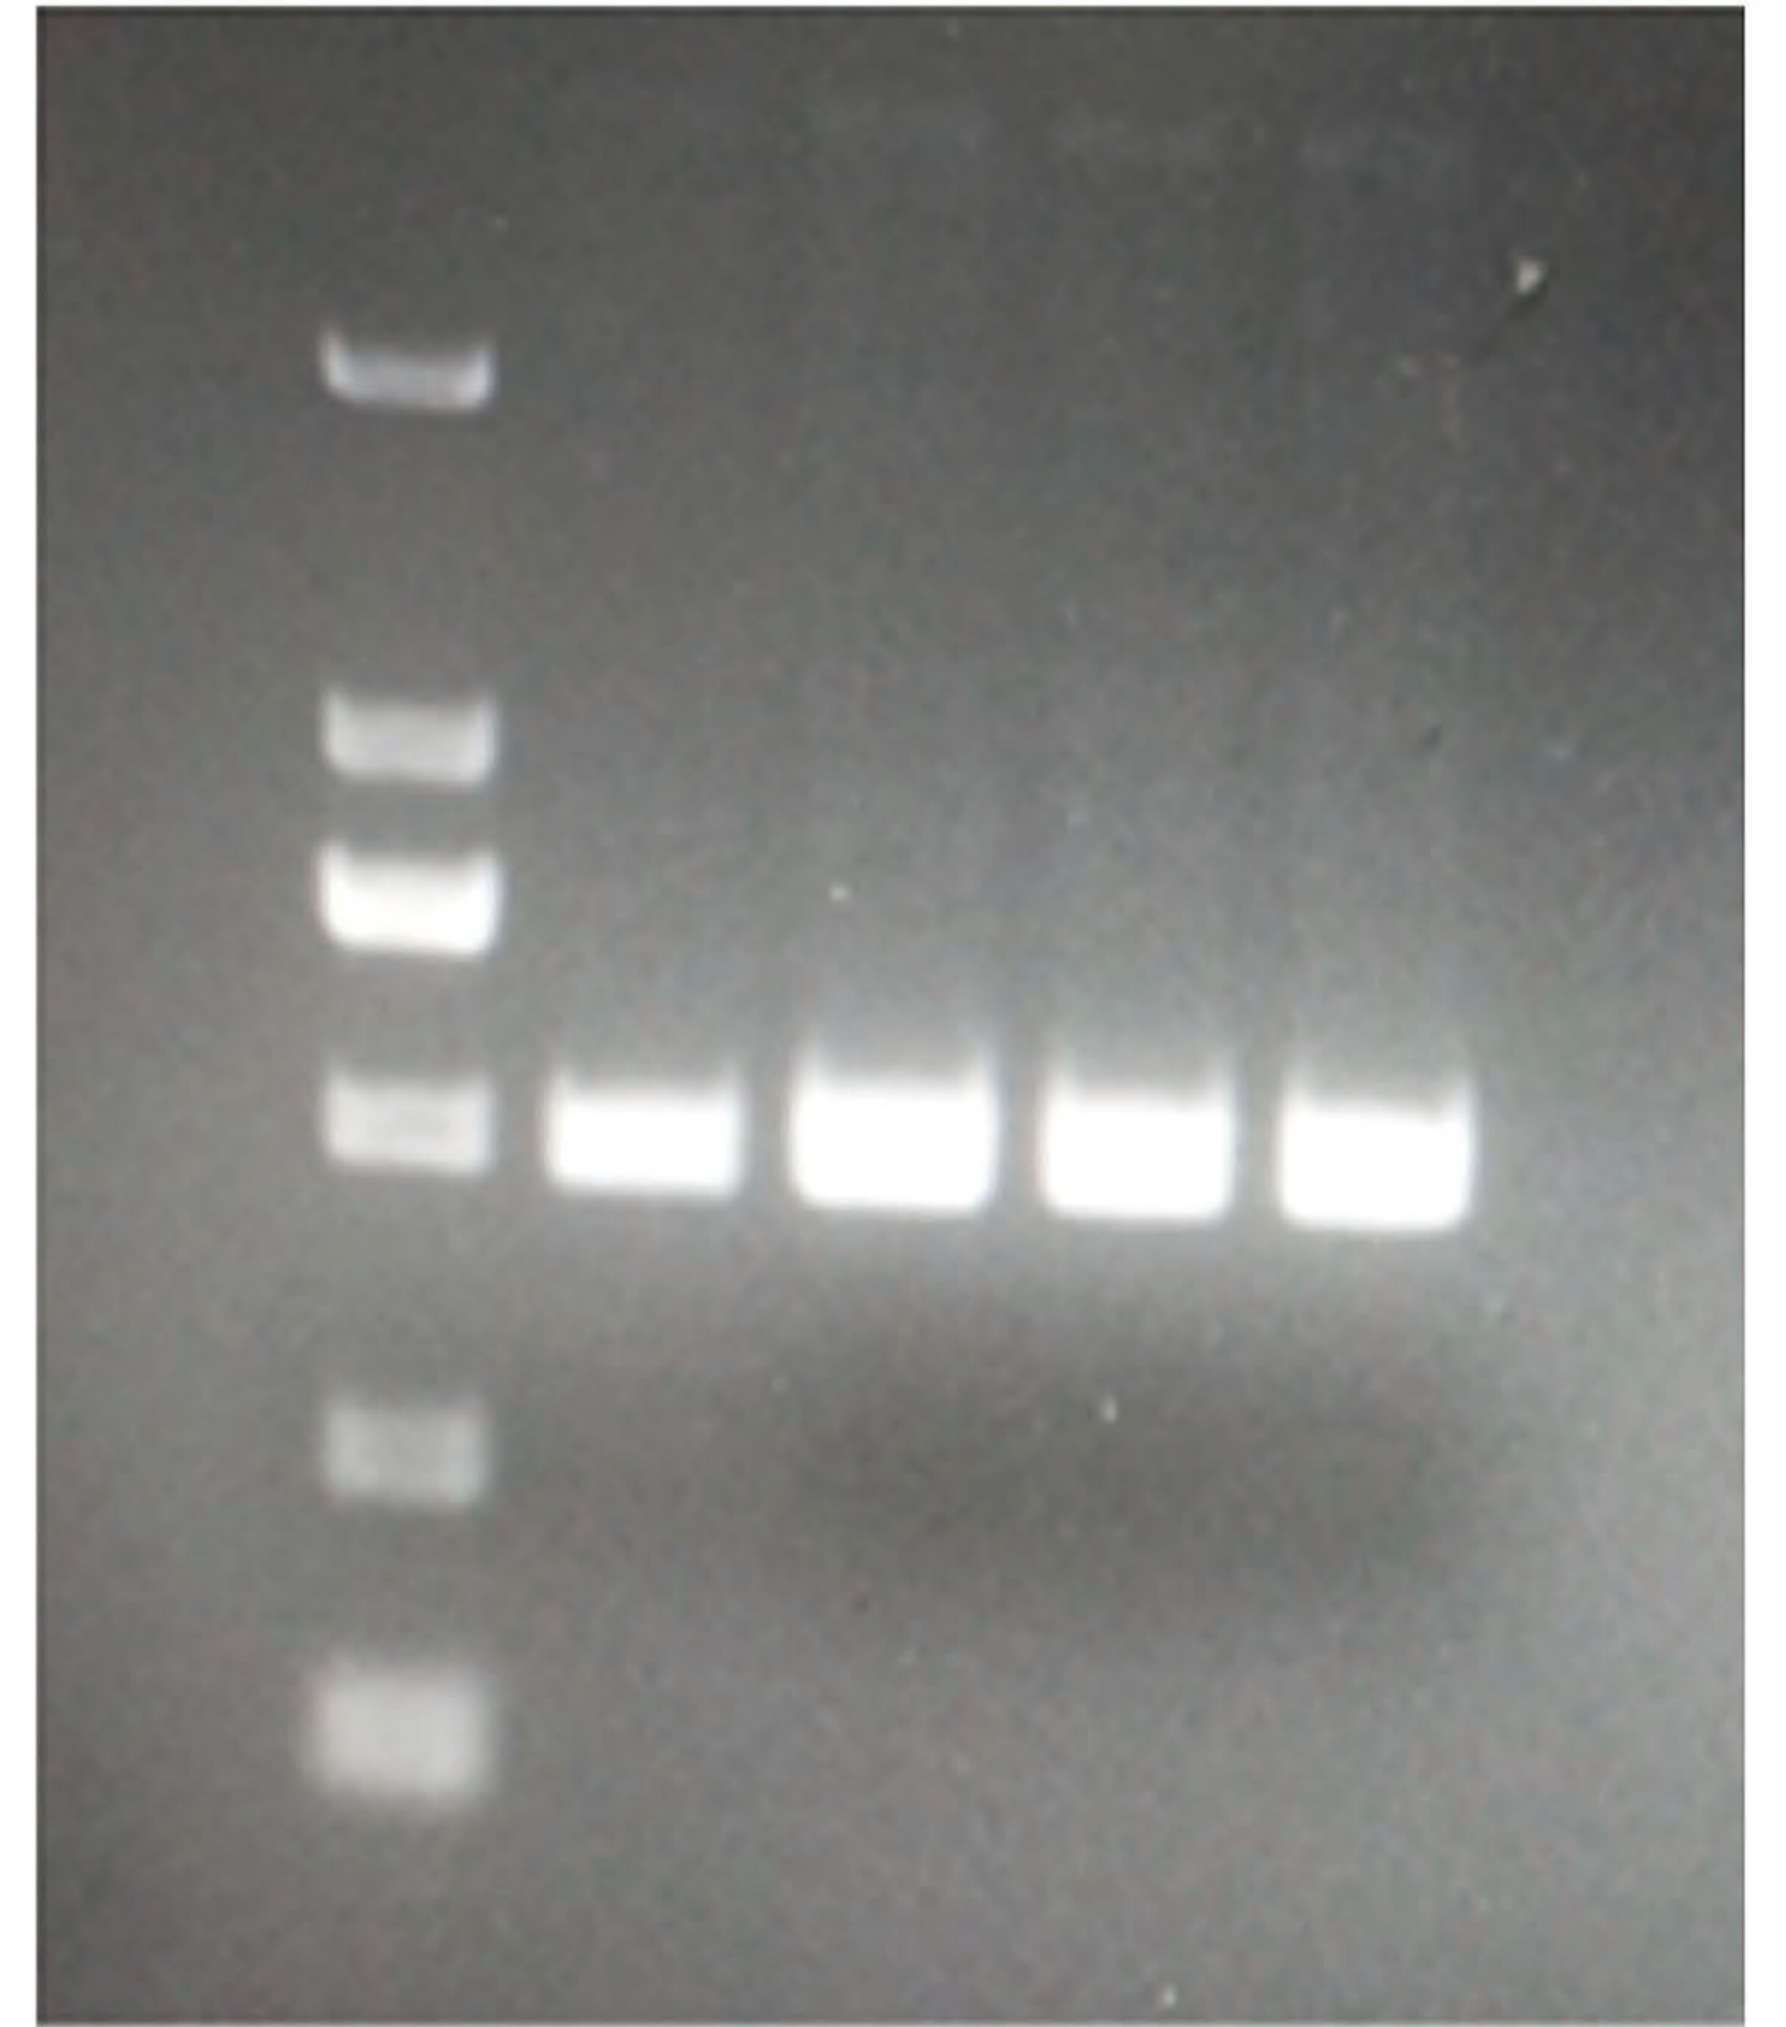

Supplement: f2 [file 1395304.f2.pdf]
