# Supplementary material for: Expression and Functional Characterization of a Novel Antimicrobial Peptide: Human Beta‐Defensin 118
Source: Hindawi journal article supplement (doi:10.1155/2020/1395304), 2020-01-01

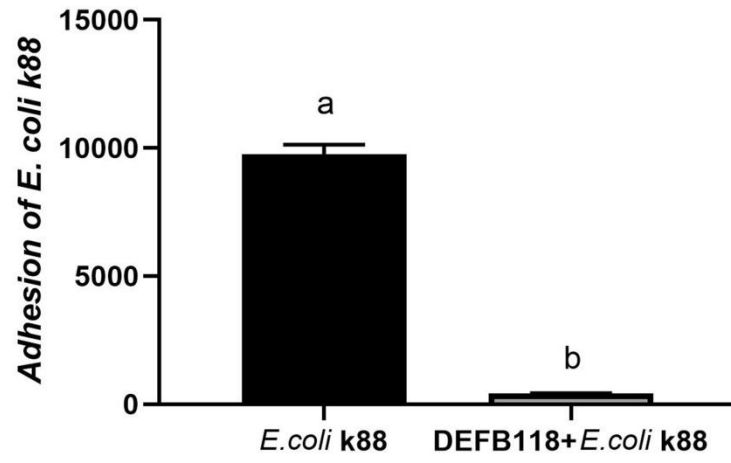

Supplement: f3 [file 1395304.f3.pdf]
